# Supplementary material for: Weight-Adjusted Waist Index and Mortality Among Older Adults: Findings from NHANES 1999–2018
Source: Research Square preprint supplement (doi:10.21203/rs.3.rs-6987746/v1), 2025-11-18
Supplement: Supplementary file 1 [file 423f0117d602ae7f9aaa1fe2.xlsx]

## Sheet: Sheet1
		All-cause mortality					Cardiovascular mortality
			N					N
		Age (years) group					Age (years) group
		60 - 65	5369	1.33 (1.22, 1.45) <0.0001			60 - 65	5369	1.41 (1.19, 1.67) <0.0001
		66 - 73	5168	1.15 (1.08, 1.23) <0.0001			66 - 73	5168	1.12 (0.99, 1.28) 0.0726
		74 - 85	5705	1.11 (1.06, 1.16) <0.0001			74 - 85	5705	1.20 (1.11, 1.30) <0.0001
		Sex					Sex
		Male	8100	1.47 (1.39, 1.55) <0.0001			Male	8100	1.59 (1.44, 1.74) <0.0001
		Female	8142	1.33 (1.27, 1.40) <0.0001			Female	8142	1.43 (1.31, 1.56) <0.0001
		Ethnicity					Ethnicity
		Non-Hispanic White	8299	1.45 (1.39, 1.52) <0.0001			Non-Hispanic White	8299	1.59 (1.47, 1.72) <0.0001
		Non-Hispanic Black	3184	1.21 (1.11, 1.32) <0.0001			Non-Hispanic Black	3184	1.19 (1.03, 1.38) 0.0207
		Mexican American	2439	1.28 (1.16, 1.42) <0.0001			Mexican American	2439	1.41 (1.17, 1.69) 0.0002
		Other Hispanic	1253	1.44 (1.21, 1.72) <0.0001			Other Hispanic	1253	1.85 (1.37, 2.50) <0.0001
		Other Race	1067	1.66 (1.35, 2.04) <0.0001			Other Race	1067	1.58 (1.05, 2.38) 0.0297
		Education level					Education level
		Below high school	3073	1.04 (0.97, 1.12) 0.2632			Below high school	3073	1.05 (0.92, 1.19) 0.4817
		High school	6282	1.30 (1.23, 1.37) <0.0001			High school	6282	1.35 (1.23, 1.49) <0.0001
		Above high school	6853	1.53 (1.44, 1.62) <0.0001			Above high school	6853	1.72 (1.55, 1.91) <0.0001
		Smoking status					Smoking status
		never	7834	1.33 (1.26, 1.40) <0.0001			never	7834	1.41 (1.29, 1.54) <0.0001
		former	6307	1.43 (1.36, 1.52) <0.0001			former	6307	1.56 (1.41, 1.72) <0.0001
		now	2082	1.07 (0.98, 1.18) 0.1462			now	2082	1.09 (0.92, 1.29) 0.3319
		MARITAL recoded					MARITAL recoded
		Married/Living with Partner	9471	1.37 (1.30, 1.44) <0.0001			Married/Living with Partner	9471	1.56 (1.42, 1.71) <0.0001
		Widowed/Divorced/Separated	5882	1.21 (1.15, 1.28) <0.0001			Widowed/Divorced/Separated	5882	1.20 (1.10, 1.31) <0.0001
		Never married	742	1.17 (1.00, 1.37) 0.0575			Never married	742	1.37 (1.06, 1.78) 0.0167
		Missing	147	1.31 (1.01, 1.71) 0.0394			Missing	147	1.46 (0.92, 2.34) 0.1106
		Poverty income ratio					Poverty income ratio
		Poor	2507	1.09 (1.00, 1.18) 0.0439			Poor	2507	1.05 (0.91, 1.21) 0.5176
		Nearly poor	4459	1.21 (1.13, 1.29) <0.0001			Nearly poor	4459	1.35 (1.21, 1.50) <0.0001
		Middle income	4151	1.32 (1.23, 1.42) <0.0001			Middle income	4151	1.39 (1.23, 1.57) <0.0001
		High income	3479	1.51 (1.38, 1.67) <0.0001			High income	3479	1.74 (1.47, 2.07) <0.0001
		Missing	1646	1.34 (1.20, 1.50) <0.0001			Missing	1646	1.38 (1.13, 1.69) 0.0019
		Alcohol use recoded					Alcohol use recoded
		Never	2681	1.27 (1.18, 1.38) <0.0001			Never	2681	1.35 (1.18, 1.55) <0.0001
		Former	4040	1.19 (1.12, 1.27) <0.0001			Former	4040	1.23 (1.10, 1.37) 0.0002
		Mild	5709	1.46 (1.37, 1.56) <0.0001			Mild	5709	1.58 (1.42, 1.77) <0.0001
		Moderate	1417	1.31 (1.14, 1.51) 0.0002			Moderate	1417	1.66 (1.30, 2.13) <0.0001
		Heavy	1111	1.22 (1.03, 1.44) 0.0212			Heavy	1111	1.24 (0.92, 1.68) 0.1619
		Missing	1284	1.24 (1.07, 1.44) 0.0037			Missing	1284	1.35 (1.03, 1.76) 0.0308
		Total physical activity(MET/week)					Total physical activity(MET/week)
		<600	3729	1.37 (1.28, 1.47) <0.0001			<600	3729	1.52 (1.35, 1.72) <0.0001
		>=600	6493	1.27 (1.18, 1.36) <0.0001			>=600	6493	1.40 (1.24, 1.58) <0.0001
		Missing	6020	1.17 (1.11, 1.23) <0.0001			Missing	6020	1.20 (1.09, 1.31) <0.0001
		Hypertension					Hypertension
		No	4779	1.35 (1.26, 1.45) <0.0001			No	4779	1.46 (1.28, 1.67) <0.0001
		Yes	11461	1.28 (1.23, 1.33) <0.0001			Yes	11461	1.34 (1.25, 1.43) <0.0001
		Diabetes Mellitus					Diabetes Mellitus
		No	9663	1.32 (1.26, 1.38) <0.0001			No	9663	1.43 (1.32, 1.55) <0.0001
		Diabetes Mellitus	5050	1.21 (1.14, 1.30) <0.0001			Diabetes Mellitus	5050	1.23 (1.10, 1.38) 0.0003
		IFG(Impaired Fasting Glycaemia)	966	1.52 (1.30, 1.78) <0.0001			IFG(Impaired Fasting Glycaemia)	966	1.64 (1.24, 2.16) 0.0005
		IGT(Impaired Glucose Tolerance)	563	1.03 (0.85, 1.25) 0.7799			IGT(Impaired Glucose Tolerance)	563	1.11 (0.79, 1.56) 0.5474

## Sheet: Sheet1 (2)
		All-cause mortality		HR(95% CI)			Cardiovascular mortality
			N
		Age (years) group					Age (years) group	N	plot	p value
		60 - 65	5369	1.33 (1.22, 1.45)	<0.0001		60 - 65	5369	1.41 (1.19, 1.67)	<0.0001
		66 - 73	5168	1.15 (1.08, 1.23)	<0.0001		66 - 73	5168	1.12 (0.99, 1.28)	0.0726
		74 - 85	5705	1.11 (1.06, 1.16)	<0.0001		74 - 85	5705	1.20 (1.11, 1.30)	<0.0001
		Sex					Sex
		Male	8100	1.47 (1.39, 1.55)	<0.0001		Male	8100	1.59 (1.44, 1.74)	<0.0001
		Female	8142	1.33 (1.27, 1.40)	<0.0001		Female	8142	1.43 (1.31, 1.56)	<0.0001
		Ethnicity					Ethnicity
		Non-Hispanic White	8299	1.45 (1.39, 1.52)	<0.0001		Non-Hispanic White	8299	1.59 (1.47, 1.72)	<0.0001
		Non-Hispanic Black	3184	1.21 (1.11, 1.32)	<0.0001		Non-Hispanic Black	3184	1.19 (1.03, 1.38)	0.0207
		Mexican American	2439	1.28 (1.16, 1.42)	<0.0001		Mexican American	2439	1.41 (1.17, 1.69)	0.0002
		Other Hispanic	1253	1.44 (1.21, 1.72)	<0.0001		Other Hispanic	1253	1.85 (1.37, 2.50)	<0.0001
		Other Race	1067	1.66 (1.35, 2.04)	<0.0001		Other Race	1067	1.58 (1.05, 2.38)	0.0297
		Education level					Education level
		Below high school	3073	1.04 (0.97, 1.12)	0.2632		Below high school	3073	1.05 (0.92, 1.19)	0.4817
		High school	6282	1.30 (1.23, 1.37)	<0.0001		High school	6282	1.35 (1.23, 1.49)	<0.0001
		Above high school	6853	1.53 (1.44, 1.62)	<0.0001		Above high school	6853	1.72 (1.55, 1.91)	<0.0001
		Smoking status					Smoking status
		never	7834	1.33 (1.26, 1.40)	<0.0001		never	7834	1.41 (1.29, 1.54)	<0.0001
		former	6307	1.43 (1.36, 1.52)	<0.0001		former	6307	1.56 (1.41, 1.72)	<0.0001
		now	2082	1.07 (0.98, 1.18)	0.1462		now	2082	1.09 (0.92, 1.29)	0.3319
		MARITAL recoded					MARITAL recoded
		Married/Living with Partner	9471	1.37 (1.30, 1.44)	<0.0001		Married/Living with Partner	9471	1.56 (1.42, 1.71)	<0.0001
		Widowed/Divorced/Separated	5882	1.21 (1.15, 1.28)	<0.0001		Widowed/Divorced/Separated	5882	1.20 (1.10, 1.31)	<0.0001
		Never married	742	1.17 (1.00, 1.37)	0.0575		Never married	742	1.37 (1.06, 1.78)	0.0167
		Missing	147	1.31 (1.01, 1.71)	0.0394		Missing	147	1.46 (0.92, 2.34)	0.1106
		Poverty income ratio					Poverty income ratio
		Poor	2507	1.09 (1.00, 1.18)	0.0439		Poor	2507	1.05 (0.91, 1.21)	0.5176
		Nearly poor	4459	1.21 (1.13, 1.29)	<0.0001		Nearly poor	4459	1.35 (1.21, 1.50)	<0.0001
		Middle income	4151	1.32 (1.23, 1.42)	<0.0001		Middle income	4151	1.39 (1.23, 1.57)	<0.0001
		High income	3479	1.51 (1.38, 1.67)	<0.0001		High income	3479	1.74 (1.47, 2.07)	<0.0001
		Missing	1646	1.34 (1.20, 1.50)	<0.0001		Missing	1646	1.38 (1.13, 1.69)	0.0019
		Alcohol use recoded					Alcohol use recoded
		Never	2681	1.27 (1.18, 1.38)	<0.0001		Never	2681	1.35 (1.18, 1.55)	<0.0001
		Former	4040	1.19 (1.12, 1.27)	<0.0001		Former	4040	1.23 (1.10, 1.37)	0.0002
		Mild	5709	1.46 (1.37, 1.56)	<0.0001		Mild	5709	1.58 (1.42, 1.77)	<0.0001
		Moderate	1417	1.31 (1.14, 1.51)	0.0002		Moderate	1417	1.66 (1.30, 2.13)	<0.0001
		Heavy	1111	1.22 (1.03, 1.44)	0.0212		Heavy	1111	1.24 (0.92, 1.68)	0.1619
		Missing	1284	1.24 (1.07, 1.44)	0.0037		Missing	1284	1.35 (1.03, 1.76)	0.0308
		Total physical activity(MET/week)					Total physical activity(MET/week)
		<600	3729	1.37 (1.28, 1.47)	<0.0001		<600	3729	1.52 (1.35, 1.72)	<0.0001
		>=600	6493	1.27 (1.18, 1.36)	<0.0001		>=600	6493	1.40 (1.24, 1.58)	<0.0001
		Missing	6020	1.17 (1.11, 1.23)	<0.0001		Missing	6020	1.20 (1.09, 1.31)	<0.0001
		Hypertension					Hypertension
		No	4779	1.35 (1.26, 1.45)	<0.0001		No	4779	1.46 (1.28, 1.67)	<0.0001
		Yes	11461	1.28 (1.23, 1.33)	<0.0001		Yes	11461	1.34 (1.25, 1.43)	<0.0001
		Diabetes Mellitus					Diabetes Mellitus
		No	9663	1.32 (1.26, 1.38)	<0.0001		No	9663	1.43 (1.32, 1.55)	<0.0001
		Diabetes Mellitus	5050	1.21 (1.14, 1.30)	<0.0001		Diabetes Mellitus	5050	1.23 (1.10, 1.38)	0.0003
		IFG(Impaired Fasting Glycaemia)	966	1.52 (1.30, 1.78)	<0.0001		IFG(Impaired Fasting Glycaemia)	966	1.64 (1.24, 2.16)	0.0005
		IGT(Impaired Glucose Tolerance)	563	1.03 (0.85, 1.25)	0.7799		IGT(Impaired Glucose Tolerance)	563	1.11 (0.79, 1.56)	0.5474
